# Supplementary material
Source: Elsevier journal article supplement (https://www.sciencedirect.com/science/article/pii/S0210569118302201)
Supplement: mmc1 [file S0210569118302201:mmc1.pdf]

## MATERIAL SUPLEMENTARIO

Tabla Suplementaria 1. Criterios de Acreditación de la ANECA

| 1a. Combinaciones de Calificaciones Mínimas exigidas                                                                                                                                                                                                                                                                                                                                                                                                                                                                                                                                                                                                                                        |               |                       |                                      |                       |           |
|---------------------------------------------------------------------------------------------------------------------------------------------------------------------------------------------------------------------------------------------------------------------------------------------------------------------------------------------------------------------------------------------------------------------------------------------------------------------------------------------------------------------------------------------------------------------------------------------------------------------------------------------------------------------------------------------|---------------|-----------------------|--------------------------------------|-----------------------|-----------|
|                                                                                                                                                                                                                                                                                                                                                                                                                                                                                                                                                                                                                                                                                             | Investigación | Docencia              | Trasferencia y Actividad Profesional | Gestión               | Formación |
| Calificación Mínima                                                                                                                                                                                                                                                                                                                                                                                                                                                                                                                                                                                                                                                                         | B             | B                     |                                      |                       |           |
| Calificación Mínima                                                                                                                                                                                                                                                                                                                                                                                                                                                                                                                                                                                                                                                                         | A             | C / E <sup>2</sup>    |                                      |                       | B         |
| Calificación Mínima                                                                                                                                                                                                                                                                                                                                                                                                                                                                                                                                                                                                                                                                         | B             | C                     | B                                    |                       | B         |
| Calificación Mínima                                                                                                                                                                                                                                                                                                                                                                                                                                                                                                                                                                                                                                                                         | B             | C                     |                                      | B                     | B         |
| Calificación Mínima                                                                                                                                                                                                                                                                                                                                                                                                                                                                                                                                                                                                                                                                         | C             | B                     | A                                    |                       | B         |
| (2) El nivel E solo es válido para la acreditación cuando un solicitante haya desarrollado su carrera principalmente en una institución no universitaria o en una universidad no española.<br>En <i>rosa</i> opción valorada más factible                                                                                                                                                                                                                                                                                                                                                                                                                                                   |               |                       |                                      |                       |           |
| 1b. Méritos Obligatorios en Investigación                                                                                                                                                                                                                                                                                                                                                                                                                                                                                                                                                                                                                                                   |               |                       |                                      |                       |           |
| Calificación “mínima”                                                                                                                                                                                                                                                                                                                                                                                                                                                                                                                                                                                                                                                                       | A             | B                     | C*                                   |                       |           |
| Publicaciones T1 + T2 en JCR:                                                                                                                                                                                                                                                                                                                                                                                                                                                                                                                                                                                                                                                               | 40            | 25                    | 12                                   |                       |           |
| en T1                                                                                                                                                                                                                                                                                                                                                                                                                                                                                                                                                                                                                                                                                       | 20            | 12                    | 8                                    |                       |           |
| con AP (en T1)                                                                                                                                                                                                                                                                                                                                                                                                                                                                                                                                                                                                                                                                              | 15 (10)       | 10 (5)                | 7 (3)                                |                       |           |
| en D1                                                                                                                                                                                                                                                                                                                                                                                                                                                                                                                                                                                                                                                                                       | 3             |                       |                                      |                       |           |
| (*) más 2 méritos complementarios (2 direcciones de tesis, 1 conferencia plenaria de congresos, 2 IPs ó 3 ICs de proyectos de investigación competitivos, editor de revistas en T1 del JCR, etc). Como norma general, las publicaciones del tipo cartas, revisiones y casos clínicos-notas clínicas no se considerarán. Los trabajos de multiautoría (aquellos de más de 12 autores en los que el solicitante no es autor preferente) computarán para los méritos obligatorios hasta un máximo del 20% de la producción científica esperada.<br>T: Tercil, D: Decil, AP: Autoría Preferente (primero o último firmante o corresponding author). En <i>rosa</i> opción valorada más factible |               |                       |                                      |                       |           |
| 1c. Méritos Obligatorios en Docencia                                                                                                                                                                                                                                                                                                                                                                                                                                                                                                                                                                                                                                                        |               |                       |                                      |                       |           |
| Calificación “mínima”                                                                                                                                                                                                                                                                                                                                                                                                                                                                                                                                                                                                                                                                       | A             | B                     | C                                    |                       |           |
| Evaluaciones Favorables                                                                                                                                                                                                                                                                                                                                                                                                                                                                                                                                                                                                                                                                     | 4 cursos      | 1 curso               | 1 curso                              |                       |           |
| DTO Tiempo Completo                                                                                                                                                                                                                                                                                                                                                                                                                                                                                                                                                                                                                                                                         | 10 años       | 5 años                | 3 años                               |                       |           |
| DTO Tiempo Parcial*                                                                                                                                                                                                                                                                                                                                                                                                                                                                                                                                                                                                                                                                         | 16 años       | 10 años               | 6 años                               |                       |           |
| (*) o un tiempo equivalente entre ambas dedicaciones.<br>DTO: Docencia Titulaciones Oficiales. En <i>rosa</i> opción valorada más factible                                                                                                                                                                                                                                                                                                                                                                                                                                                                                                                                                  |               |                       |                                      |                       |           |
| 1d. Méritos Obligatorios en Trasferencia y Actividad Profesional                                                                                                                                                                                                                                                                                                                                                                                                                                                                                                                                                                                                                            |               |                       |                                      |                       |           |
| Calificación “mínima”                                                                                                                                                                                                                                                                                                                                                                                                                                                                                                                                                                                                                                                                       | A             |                       | B                                    |                       |           |
| Opciones: Número de Méritos                                                                                                                                                                                                                                                                                                                                                                                                                                                                                                                                                                                                                                                                 | Trasferencia  | Actividad Profesional | Trasferencia                         | Actividad Profesional |           |
| Opción 1                                                                                                                                                                                                                                                                                                                                                                                                                                                                                                                                                                                                                                                                                    | 8             |                       | 6                                    |                       |           |
| Opción 2                                                                                                                                                                                                                                                                                                                                                                                                                                                                                                                                                                                                                                                                                    |               | 4                     |                                      | 3                     |           |
| Opción 3*                                                                                                                                                                                                                                                                                                                                                                                                                                                                                                                                                                                                                                                                                   | 6             | 2                     | 4                                    | 2                     |           |
| Opción 4*                                                                                                                                                                                                                                                                                                                                                                                                                                                                                                                                                                                                                                                                                   | 4             | 3                     |                                      |                       |           |
| (*) Suma de ambos. En <i>rosa</i> opción valorada más factible                                                                                                                                                                                                                                                                                                                                                                                                                                                                                                                                                                                                                              |               |                       |                                      |                       |           |
